# Supplementary material for: SSRMMD: A Rapid and Accurate Algorithm for Mining SSR Feature Loci and Candidate Polymorphic SSRs Based on Assembled Sequences
Source: Front Genet. 2020 Jul 27;11:706. doi: 10.3389/fgene.2020.00706 (PMC7398111; doi:10.3389/fgene.2020.00706)
Supplement: TABLE S1 — Molecular experiments to verify the accuracy of the output by SSRMMD in wheat. [file Table_1.XLS]

## Sheet: output
Supplementary Table S1. Molecular experiments to verify the accuracy of the output by SSRMMD in wheat
Primer	Motif	Chromosome	CS_repeat_number	CS_start	CS_end	AK58_repeat_number	AK58_start	AK58_end	Forward_primer	Reverse_primer	Product_length(bp)	Polymorphisma
1	G	1A	15	26528987	26529001	22	25136784	25136805	ATCGACGGTAATCGTGTTCC	GGCACACCAAACATTACTCTGA	247	NA
2	TCCTAT	1A	6	316270834	316270869	4	323649796	323649819	TACGATGTGAACAAAGGGCA	GGGTAGGCAAATCATAGGAGAA	243	NA
3	ATA	1B	22	254702326	254702391	20	298744510	298744569	ATGAACGGACCGTGTGCTAT	TAGAACCGTCGCGTGTACTG	243	NA
4	TTAA	1B	5	282400495	282400514	7	326609412	326609439	GTTTCGCCCGATCCACTAAG	TGACTTGGTCAAACTGACGC	224	NA
5	GCGAGG	1B	5	258833855	258833884	4	302780133	302780156	TCGCTACAACCTTGCACTTG	TCCTGTCAACTCATCGAACG	264	yes
6	C	1D	10	74472186	74472195	16	71006117	71006132	GGCAACCAAACACTAGGGAA	GGCCAAGTAAAGCATGTGTG	130	yes
7	GA	1D	21	3063816	3063857	15	2262203	2262232	TGGACCTCCATGAAGACCAT	CGGAGGGAGAACTACTCACG	201	yes
8	CAA	1D	16	4546766	4546813	14	3773323	3773364	TTCACAACAACGACCACCAT	GTTGGTGTTGCGAAAAAGGT	167	yes
9	CTAT	1D	9	6802716	6802751	11	6026123	6026166	ATGGTCTGTTGGCTTTGAGG	TGGGAAGGTTAGACCAAAACA	221	NA
10	GTAGAT	1D	6	246093193	246093228	5	244450698	244450727	CCTATTGCAACAGCTCCTCC	TGCTCCTAGGGGACCAACTA	213	yes
11	TCT	2A	15	395946	395990	13	5579996	5580034	ACACGTCCAGATCTCCTTGC	ATGGATGGATGGATGAATGAA	203	yes
12	CGGGG	2A	4	7228363	7228382	6	3445546	3445575	TCCCACCTTGGAAGTTGAAG	AATAAAACGGCATGTCGCA	210	no
13	TCTA	2B	9	402345348	402345383	11	395742172	395742215	ATTCCATCTGGAGGCCTTTT	AATTCCAAGAACAGCTCGGA	223	NA
14	CGCCT	2B	6	26041926	26041955	7	20410683	20410717	TTGAGTGGGAATTGGACCTC	CGCCGTTCGTATTCGTTATC	259	yes
15	ATATCT	2B	7	88395156	88395197	5	83478413	83478442	AATCAGACGGCCTATGTTGC	GACCCTAATGAACGGTTGGA	206	NA
16	G	2D	19	3255460	3255478	12	3201012	3201023	TATCTTGTATGGTTCGGGGG	GCCGCAGATAAACTACCCAC	144	no
17	ATA	2D	22	2596456	2596521	27	2517429	2517509	GGTGGTTCAGCGAACTCAAT	CTGCCTCCATCCAGTAGCTT	299	NA
18	ATAG	2D	19	5885730	5885805	16	5683002	5683065	GCCTATCTGGACGAAGATGG	GCGCTGATGTTAGCGGAG	149	yes
19	G	3A	13	27648767	27648779	19	21150091	21150109	CCATGCAAAGCCTCTTTCAA	TCTAGTCACCATCCGGGTTT	142	yes
20	GT	3A	11	24129537	24129558	8	17440561	17440576	CTTGTCCTCTCGAAGGTGCT	ATGGGTTGGACGTTATTGGA	164	yes
21	CTG	3A	10	26126829	26126858	7	19355990	19356010	CTCTTGAAGGCCTTGAGCC	GAGCTGTGGTCACACCAGAA	236	yes
22	CTAT	3A	16	87487354	87487417	12	82639076	82639123	GGTTGCCAAGTACAGCCATC	CAAAGGCAGGAAAGGAAACA	169	yes
23	ATTA	3B	7	514547977	514548004	9	528927876	528927911	TAACTGCTAAGGCCTCTGGG	CTCAGGTCAACTAAACCGGG	221	yes
24	CACGGC	3B	6	826892961	826892996	4	844977785	844977808	AGAATGGCGGGCTACTACAA	TCAGTGGTGTTGGCGTACAT	200	yes
25	TG	3D	19	836910	836947	16	1148311	1148342	ATGCTCGCATAGTGGTAGGG	AATTTGAATTTTTGCGTGGC	226	NA
26	CGCACA	3D	6	421061223	421061258	4	431922191	431922214	TGTGCTTCTGAACCAATGGA	GTGGCCTTGCATTCAAACTT	234	yes
27	G	4A	26	2007988	2008013	18	2396107	2396124	GTGAGCCATGAGAGAGGGTG	ATCTCAAACCGTCGTCCATC	260	NA
28	TC	4A	21	1584670	1584711	18	1954984	1955019	GTGTCAACCAACCAAGCAAG	GCTATTCTCTCCACGCCATC	245	no
29	CTT	4A	18	933637	933690	16	1282350	1282397	GAATCAAATGGAGGCAAGGA	GCAGGTTGAGGAAGAACAGG	220	yes
30	TATG	4A	10	893953	893992	8	1242588	1242619	TCCTCCCTACGTACCACCAG	GCTGGTCGCTTAACTGGTTC	297	NA
31	TA	4B	29	2250605	2250662	22	2821251	2821294	TCGCAGCTACATCGACAAAC	TACAACAATCACGGGCTCAA	273	NA
32	ATA	4B	27	1980073	1980153	24	2498163	2498234	TCGGTTGACGTAAGCGAATA	CATAGTCGGCGTCATCAAGA	297	NA
33	TGTA	4B	5	4542162	4542181	7	4799216	4799243	CGGCAATAGGAGTGAGACGTA	TCATGGCACACACCATTTCT	226	NA
34	ATGAG	4B	12	672563592	672563651	7	685437453	685437487	AACAGGTTCAGAGTGGGTGG	TCTGCTGTTTTCGGGTCAAT	168	yes
35	C	4D	12	1326219	1326230	18	947053	947070	ATCCCTACTCTTCCGCACCT	ATTTGGAGGAATGCCAGTTG	256	no
36	ATGT	4D	10	120681930	120681969	8	122625682	122625713	TCTCATTGACACGCAGAAGG	TGAATGCGGTAAAGTGCGTA	258	NA
37	GA	5A	16	319572	319603	20	325191	325230	TTGGCCTAAGTTGGGCTTAC	GGGAGGTGAATTCCAATCTG	143	yes
38	CTT	5A	13	8788257	8788295	9	7817873	7817899	CTAGGAAGATGGCCCTTGTG	GGTGTCATGTGTGATCCAGG	160	yes
39	TTCT	5A	6	39820794	39820817	9	40963578	40963613	GGCAATTCTTGTTCCAGTCC	TGCATCCATTCGATTCATTG	204	yes
40	TGCAGG	5A	4	385139128	385139151	5	391678135	391678164	CACGACAATCATCAAGGGTG	GTTGTAACTTTTGCCCTCGC	248	yes
41	G	5B	31	6521023	6521053	15	1942775	1942789	TACGGTTCCGTGATGTGATG	TTTCATTCAAGCAGCACGAC	186	NA
42	CT	5B	36	9550285	9550356	31	7102780	7102841	ACTGCGCTCTTTGTTTGTACC	AGCATGATGCATACACCCAA	247	NA
43	CTCCT	5B	6	554782542	554782571	4	554272208	554272227	CGTCTTCACCGTGAGCATCT	ATATGATGCAAGCAAACGCA	153	yes
44	C	5D	20	5052210	5052229	13	9407248	9407260	GTCGACGATGTTGTATGCCA	TCATCAATCTATCCCTCGCC	260	yes
45	CTTT	5D	8	31599782	31599813	6	38295481	38295504	TAGCCCTCCTAGCTTCGTGA	GAGGCAGAGGGAGTATGCAG	157	yes
46	GTT	6A	38	8635846	8635959	41	6477264	6477386	CAACCTCAGCCCTTCAACAT	GATCAGAGACGAGCAGGAGC	248	yes
47	GTATAT	6A	13	311467808	311467885	15	312366922	312367011	GTTGCGGAGGAGATTCACAT	GGGCGCGATAATAGTGTCCT	207	NA
48	C	6B	21	9925597	9925617	13	6882228	6882240	CCGCTACTGGGTTCAGAGAG	CATGCAATAGGAGTTGGGTG	173	yes
49	AG	6B	13	1958304	1958329	10	1372641	1372660	GGATACAGTCAGGCCACGTT	GGAATGGCAAGTCTGACCAC	291	yes
50	GAAA	6B	6	4078335	4078358	8	1976205	1976236	CAACTCCATTGATAGGCGGT	AGCCCAACTCGTACACCAAC	249	yes
51	TG	6D	9	4160720	4160737	12	4864500	4864523	TGTGTCCAACTTGCTTCCAG	TTTTATCCTCTCCAAGCCGA	224	yes
52	CAA	7A	21	615595	615657	18	697857	697910	ATTGAGGACCCAGAGTGACG	GTTGGGACCACTCCCTCTTT	142	yes
53	CTCTC	7A	5	439002	439026	4	507747	507766	GACTGGGAAGGAAGGTGTTG	TGGGCGATGAATGAATTTCT	223	no
54	TTGGGC	7B	4	716191160	716191183	5	716176445	716176474	CTCGCCTCCTCGCTAATAAC	TACATCCTCAAGACCCAGCC	123	yes
55	C	7D	24	1249925	1249948	18	1388025	1388042	CGACGTGCGACTGACACTAT	ACACACACCACAGAGCAACC	211	no
56	AAATA	7D	6	9192134	9192163	4	8572480	8572499	ACATGGGAGCTTCGCTACAT	TGTTGTTGCACAATCTCGGT	146	yes
57	TATG	1A	12	598535732	598535779	10	604809315	604809354	TGTAATGTATCCATGGGGGAG	CACGAAGGGAGACATCCTGT	299	no
58	CCAGC	1A	6	596629075	596629104	7	602780570	602780604	TCAAGATGCACCGAGCATAG	TAGCCCATTTGCCTCTTCAT	172	NA
59	G	1B	25	693899893	693899917	17	743534946	743534962	TTGCAGATAAGTGGATTGCG	CCCCAGAAAGTTTCCTGCTT	151	no
60	TGTGGC	2A	4	64655440	64655463	6	60859701	60859736	TATGCGTGCTACCTGCACTT	TTTGGATGCTTTCTCCCAAC	157	yes
61	GA	2B	18	797396349	797396384	14	789227795	789227822	GCCAACCTGTAGCTTGAACC	TTCATTAGGTTGACCTCGCC	203	no
62	CCTCTC	2D	4	586227914	586227937	6	588091170	588091205	TTGACCTCAATGAAGGGGTC	TACTGCAGCACGAAGCAAAC	207	yes
63	GAGGG	3B	6	70974695	70974724	4	65940661	65940680	GGGCCTTACATAGAGAGCCA	AACGAGTTGCAGCACGTAGA	197	no
64	TTC	4D	11	502286466	502286498	13	509782045	509782083	CACCGTGCTACAGTTGGAGA	TGAAGCTGTGTTCAAGGCTG	181	yes
65	CCGAGA	5B	5	682169386	682169415	7	681337629	681337670	TGCTAGCTCCCAACTTCCAT	TACCATGTCAGGCATCTGGA	128	yes
66	TG	6A	19	618780107	618780144	13	623537256	623537281	AGCGGAGCTCTAGGGGATAC	CCTGGCACCGCATATTAACT	136	yes
67	TGCCA	6B	4	723137909	723137928	5	717858387	717858411	AACCCGGGCAAGATAAATTC	GGGCTTTATTTCAGCCCATT	245	NA
68	G	7A	18	731578043	731578060	25	736022045	736022069	TTTAACCATCGGTTTGGGAG	AATGTCATCAATCCCGGTGT	219	no
69	CT	7A	30	738217634	738217693	35	742424577	742424646	CATCCCATGGTGTGGTGTTA	TCTCTTCGCACAGGTCACTG	218	yes
70	TATG	7A	8	87137512	87137543	10	87395737	87395776	ATGCACATGATTGCCACATT	GCTGCTCTGTCCTCAAGGTT	211	NA
71	C	7B	11	746162977	746162987	20	742920610	742920629	TGATGCTCCAAAGTTTCTCTCA	GGAGGTCGTATGCAAGAGGA	130	yes
72	CTC	7D	11	619616908	619616940	6	625126829	625126846	TGGTTGCTGTTACAGGGAAA	AGAGAGGATGATAGCGCAGC	149	yes
73	ATCT	7D	8	564785465	564785496	6	570633215	570633238	ACTTTTGTCGCTCGTTGAGG	TCCCAACAGATGAACGGTCT	151	yes
74	ATAGAT	7D	6	542233839	542233874	5	547743022	547743051	CAGGTAAGATGGGAAACGGA	CTCGCTCAAGGCAGTTTCTT	214	NA
75	G	3B	26	803030679	803030704	18	822347618	822347635	GAGTGGGAGTACTTGCGACC	TGCACGGTAGTACACTTCAGC	144	yes
76	TA	3B	15	811013483	811013512	19	830307491	830307528	TGATAATTATGGACGCCCTGA	GACATGGGAATTTTGAGGGA	222	NA
77	TCA	3B	9	786794739	786794765	12	806649622	806649657	GAACGTACTTCCAGTCGTCCT	GACGATAACCGTTGGGAAGA	106	yes
78	TC	6D	26	477546839	477546890	21	483568764	483568805	TTAGAGGGGACCCTTGTGTG	GCTGGGCTGGATACTAAGCA	212	NA
79	AAT	3D	11	547265847	547265879	15	559328619	559328663	TACAAGCGAAGAGAGCCACC	TCTGTGTCCCGTGTTGACAT	242	no
80	TATG	3D	16	273673530	273673593	12	283549512	283549559	GATAGCTCAATGGGCGGATA	TGTGAGAGAACCACTGGGAA	163	yes
Note:
(a) yes indicates successful amplification and polymorphism in CS and AK58; no indicates successful amplification but no polymorphism in CS and AK58; NA indicates unsuccessful amplification.
